# Supplementary material for: Efficient hydrodeoxygenation of lignin-derived phenolic compounds under acid-free conditions over carbon-supported NiMo catalysts
Source: Royal Society of Chemistry journal article supplement (doi:10.1039/d4gc02298j), 2024-01-01
Supplement: d4gc02298j1.pdf [file d4gc02298j1.pdf]

## Supplementary Information

### **Efficient hydrodeoxygenation of lignin-derived phenolic compounds under acid-free conditions over carbon-supported NiMo catalysts**

Shan Jiang<sup>a</sup>, Riyang Shu<sup>b\*</sup>, Anqi Wang<sup>a</sup>, Zhuoli Deng<sup>a</sup>, Yuhong Xiao<sup>a</sup>, Jiajin Li<sup>a</sup>,  
Qingwei Meng<sup>a,c</sup>, Qian Zhang<sup>a,c\*</sup>

<sup>a</sup> *School of Chemical Engineering and Light Industry, Guangdong University of Technology, Guangzhou 510006, China*

<sup>b</sup> *Guangdong Provincial Key Laboratory of Functional Soft Condensed Matter, School of Materials and Energy, Guangdong University of Technology, Guangzhou 510006, PR China*

<sup>c</sup> *Guangdong Provincial Laboratory of Chemistry and Fine Chemical Engineering Jiayang Center, Jiayang 515200, China*

\*Corresponding author

E-mail address: shuriyang@gdut.edu.cn (Riyang Shu), zhangqian@gdut.edu.cn (Qian Zhang)

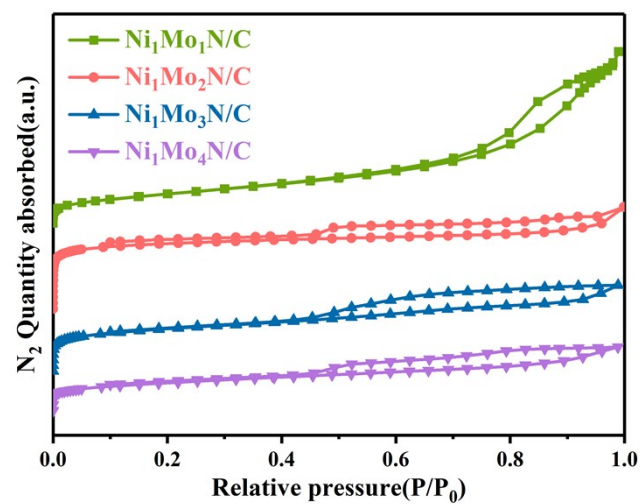

**Fig. S1.** N<sub>2</sub> adsorption/desorption isotherms of the Ni<sub>x</sub>Mo<sub>y</sub>N/C catalysts.

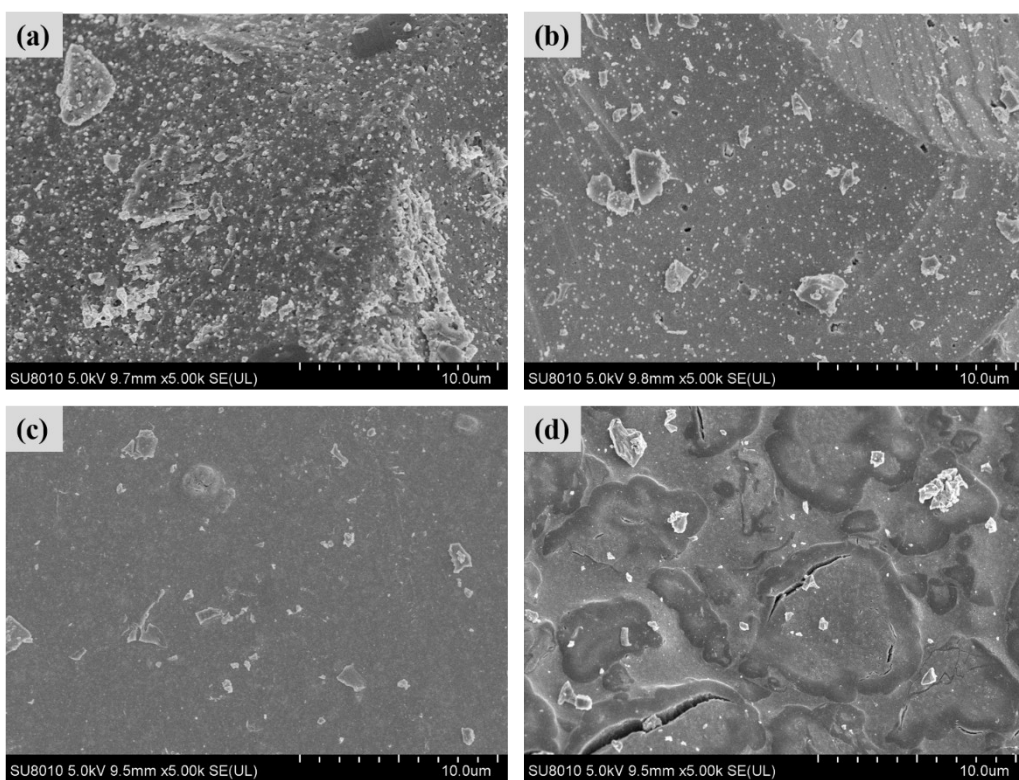

**Fig. S2.** SEM images of different Ni<sub>x</sub>Mo<sub>y</sub>N/C catalysts at large scale. (a) Ni<sub>1</sub>Mo<sub>1</sub>N/C  
(b) Ni<sub>1</sub>Mo<sub>2</sub>N/C; (c) Ni<sub>1</sub>Mo<sub>3</sub>N/C; (d) Ni<sub>1</sub>Mo<sub>4</sub>N/C.

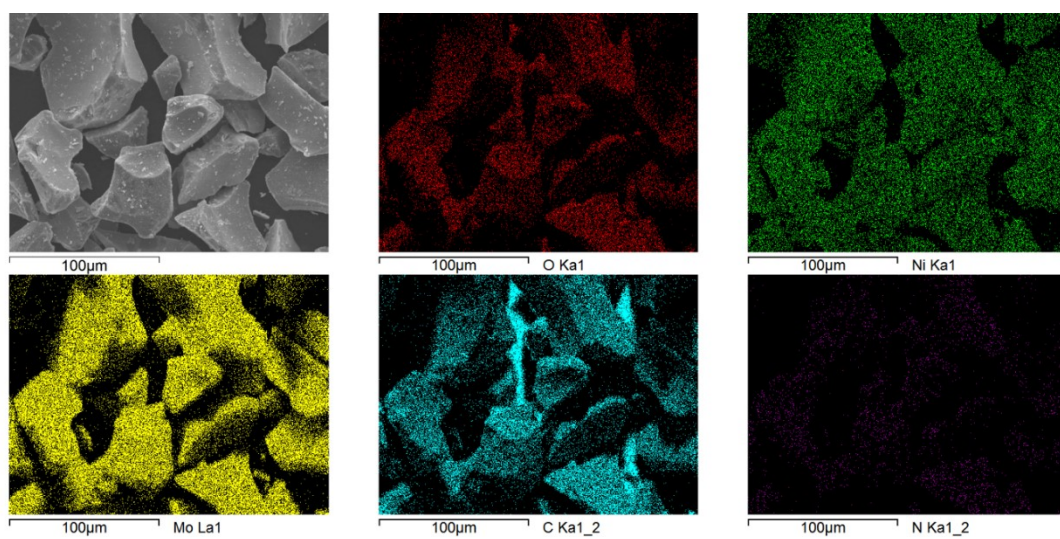

**Fig. S3.** SEM-based EDS elemental mappings for  $\text{Ni}_1\text{Mo}_1\text{N/C}$  catalyst.

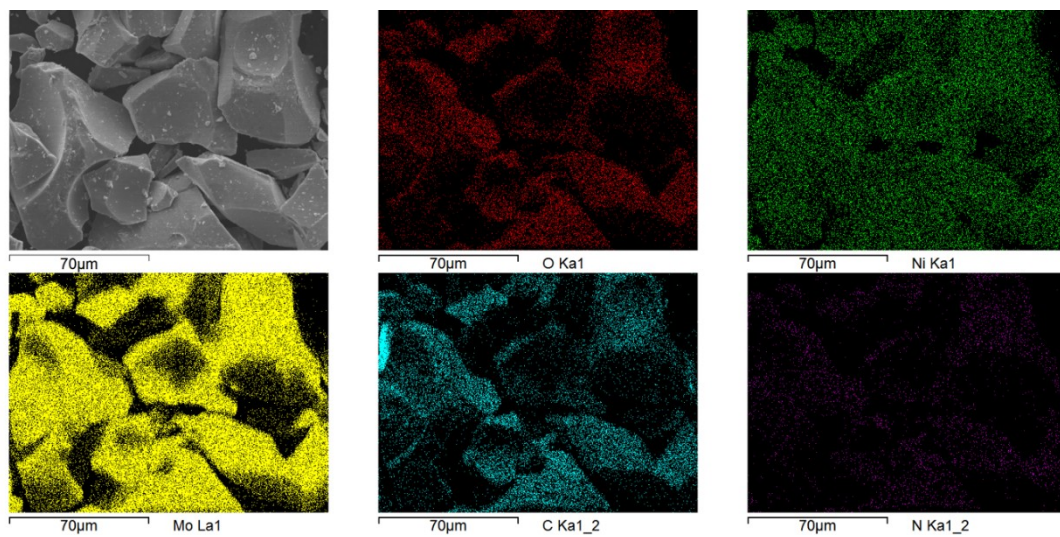

**Fig. S4.** SEM-based EDS elemental mappings for  $\text{Ni}_1\text{Mo}_2\text{N}/\text{C}$  catalyst.

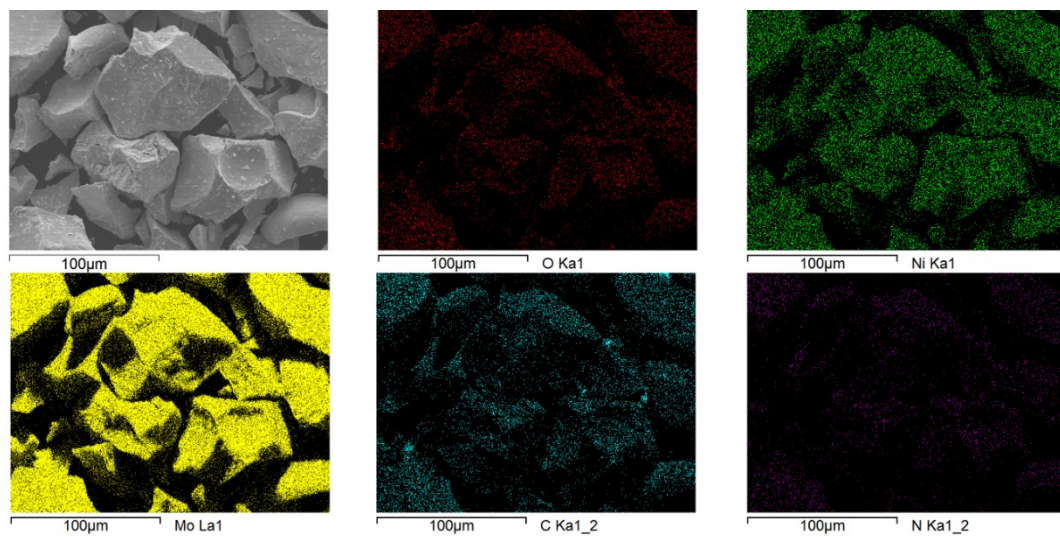

**Fig. S5.** SEM-based EDS elemental mappings for  $\text{Ni}_1\text{Mo}_3\text{N}/\text{C}$  catalyst.

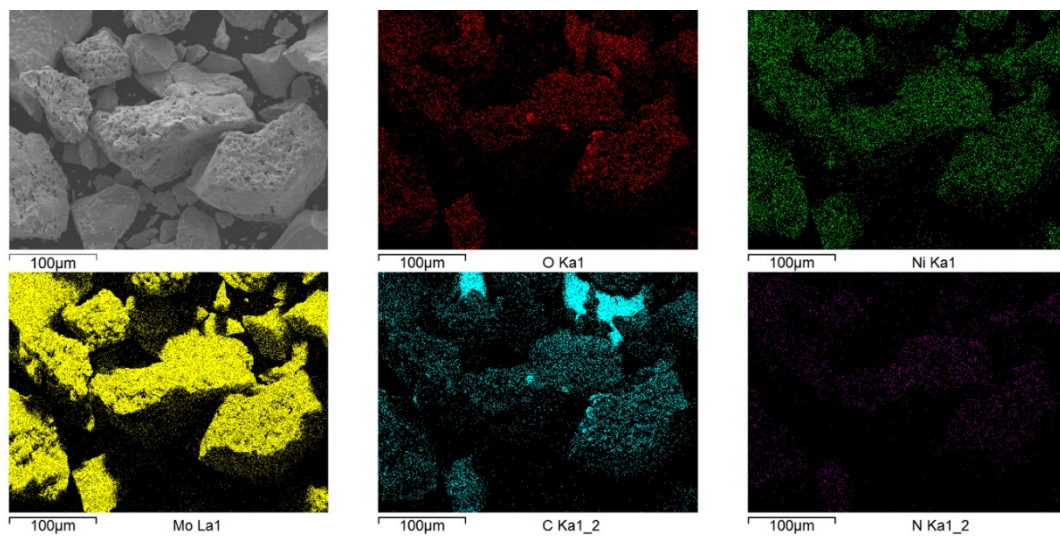

**Fig. S6.** SEM-based EDS elemental mappings for  $\text{Ni}_1\text{Mo}_4\text{N}/\text{C}$  catalyst.

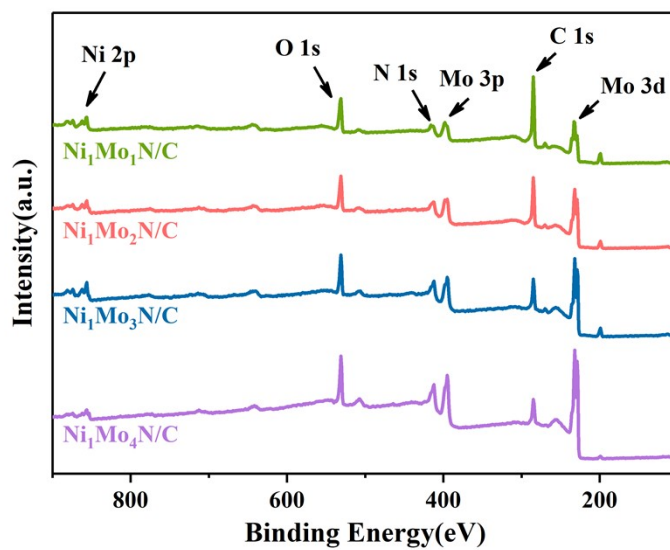

**Fig. S7.** XPS spectra of Ni<sub>x</sub>Mo<sub>y</sub>N/C catalysts: survey spectra.



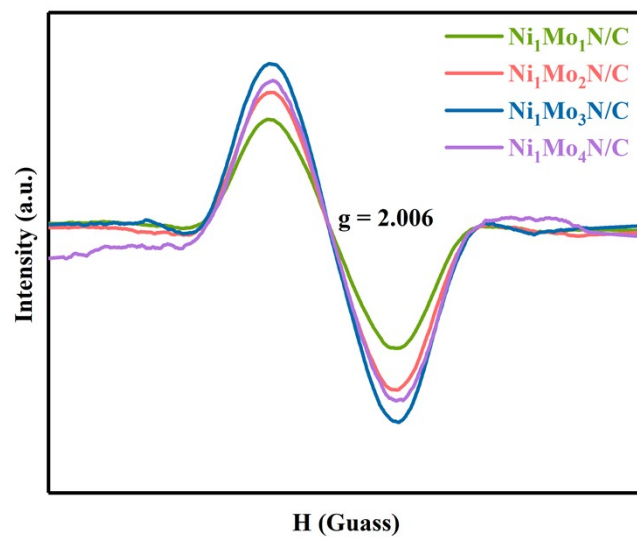

**Fig. S8.** EPR profiles of the different Ni<sub>x</sub>Mo<sub>y</sub>N/C catalysts.

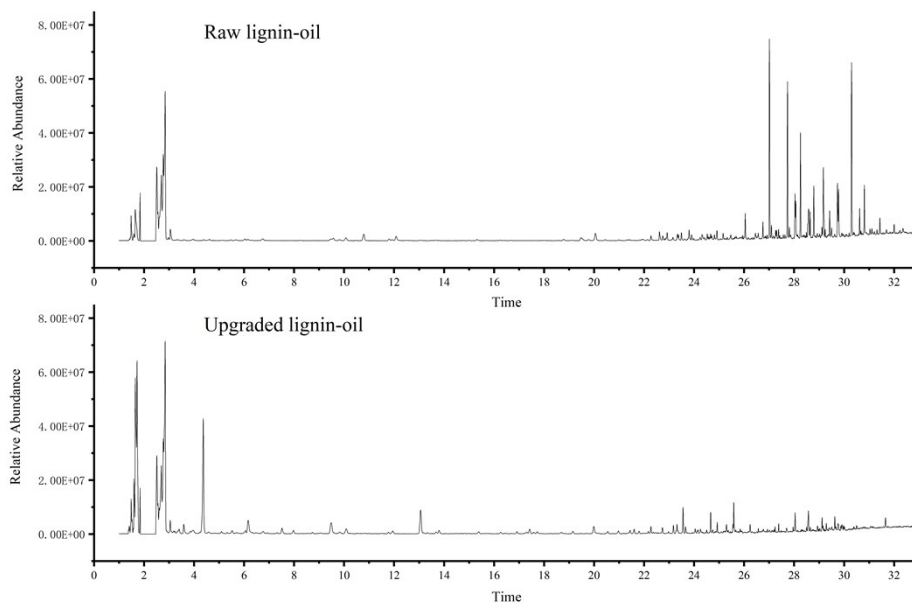

**Fig. S9.** Chromatogram of the raw lignin-oil before and after the HDO upgrading.
